# Supplementary material for: The effect of the functional ionic group of the viologen derivative on visible-light driven CO2 reduction to formic acid with the system consisting of water-soluble zinc porphyrin and formate dehydrogenase
Source: Royal Society of Chemistry journal article supplement (doi:10.1039/c7pp00277g), 2017-11-14
Supplement: c7pp00277g1.pdf [file c7pp00277g1.pdf]

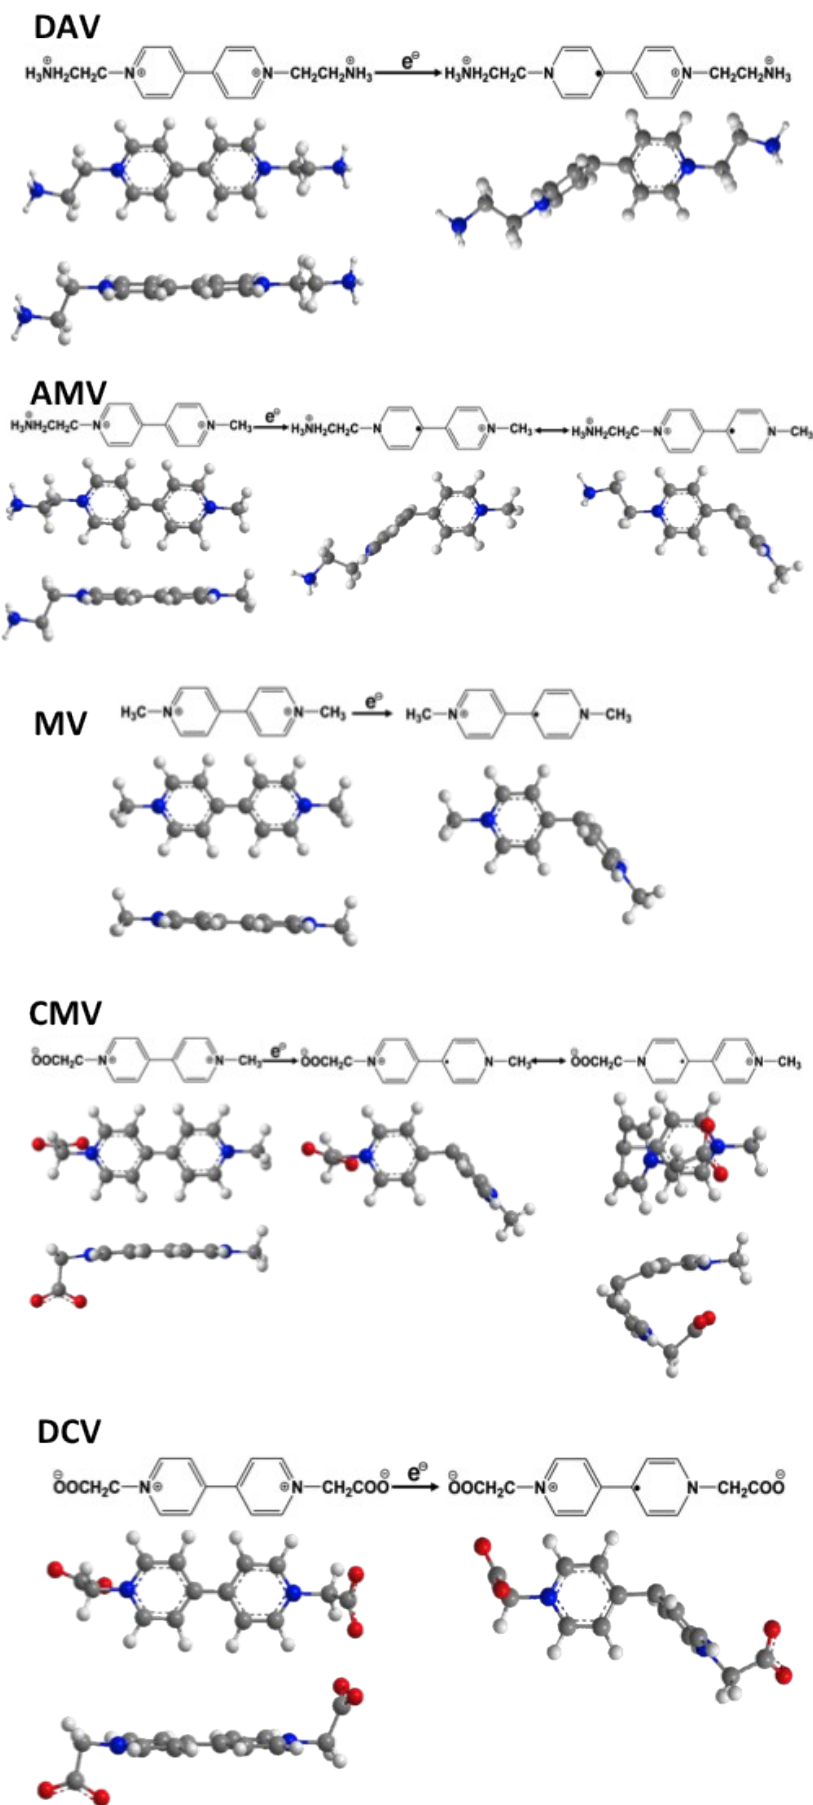

Fig. S1. Conformational Structures of the oxidized and the single-electron reduced form of 4,4'-BPs calculated using MM2.
